# Supplementary material for: Ezrin is required for efficient Rap1-induced cell spreading
Source: Oxford University Press journal article supplement (doi:10.1242/jcs.079830), 2011-05-04

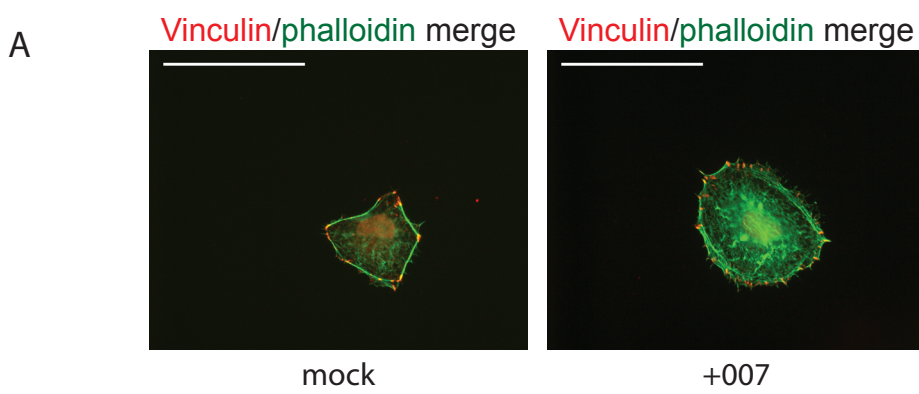

**B** Focal adhesions - number per cell

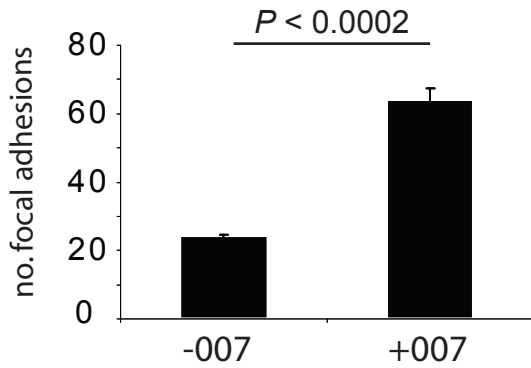

**C** Focal adhesions - total area staining for vinculin

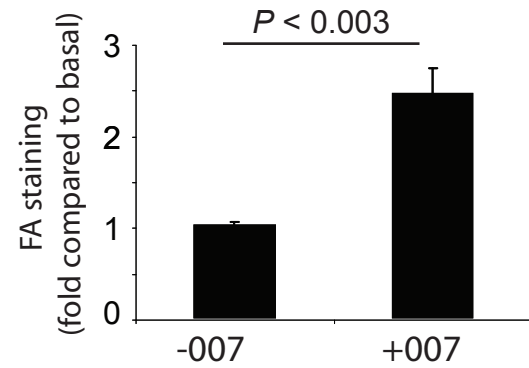

**D** Cell spreading - total area stained by phalloidin

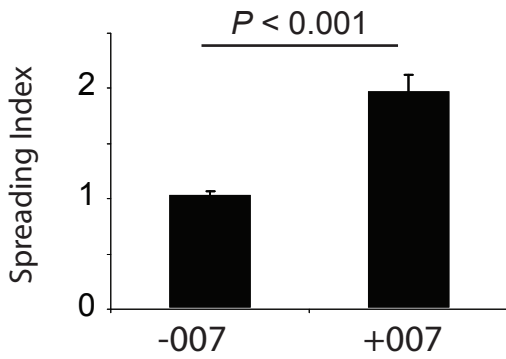

**E** Focal adhesions per area of cell

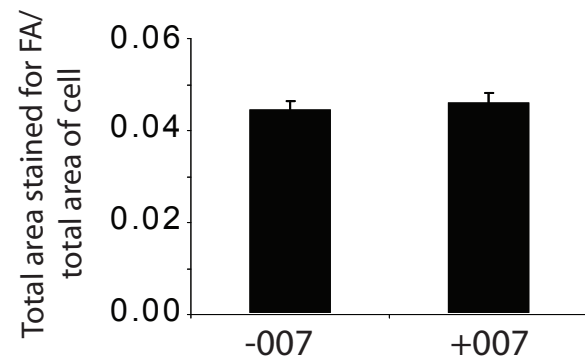

**F** Schematic representation of Rap-induced spreading

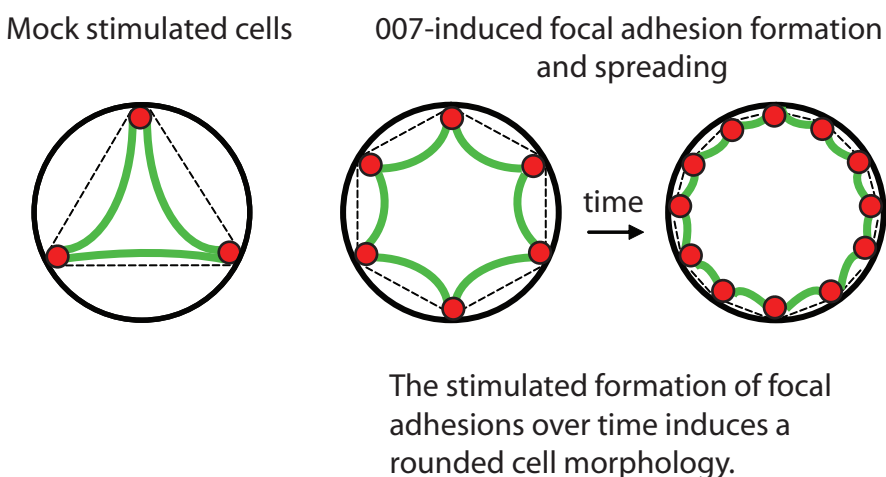

**G** Cell shape - convex hull ratio

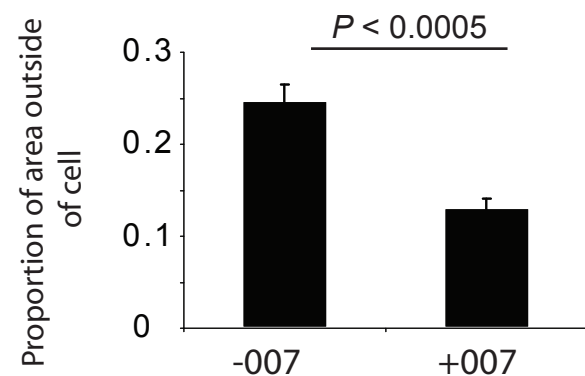

Supplement: jcs079830-sup-jcs79830figs1.pdf [file jcs079830-sup-jcs79830figs1.pdf]
