# Supplementary material for: Ezrin is required for efficient Rap1-induced cell spreading
Source: Oxford University Press journal article supplement (doi:10.1242/jcs.079830), 2011-05-04
Supplement: jcs079830-sup-jcs79830tables1.pdf [file jcs079830-sup-jcs79830tables1.pdf]

**Table S1. Overview of siRNA screen results**

The effect of siRNA depletion of proteins on focal adhesion (FA) formation and spreading under basal conditions, or when the Epac1-Rap signal transduction pathway had been activated, was determined by visual inspection of replated cells.

| <b>Protein</b>    | <b>Spreading and focal adhesion (FA) induction</b>                                                                                                           | <b>Actin phenotype</b>         |
|-------------------|--------------------------------------------------------------------------------------------------------------------------------------------------------------|--------------------------------|
| $\alpha$ -catenin | Normal                                                                                                                                                       | Normal                         |
| AF6               | Normal. Following 007, many cells showed increased spreading with more FAs. Focal adhesions were no longer restricted to the periphery of the cell.          | Normal                         |
| AF6-L/Radil       | Partial defect in the 007-induced spreading and FA formation.                                                                                                | Mixed                          |
| $\alpha$ PKC      | Normal                                                                                                                                                       | Normal                         |
| Arap1             | Normal                                                                                                                                                       | Normal                         |
| Arap3             | Small defect in basal adhesion and spreading, but a normal response to 007.                                                                                  | Normal                         |
| ARHGAP20          | Small defect in basal adhesion and spreading, but a normal response to 007.                                                                                  | Normal                         |
| $\beta$ -catenin  | Unstimulated cells were elongated and displayed an increase in cell protrusions. Spreading and FAs were stimulated by 007, but the cells remained elongated. | Increase in thin actin fibers. |
| C3G               | Cells displayed a defect in basal spreading, which was rescued and further induced by 007.                                                                   | Normal                         |
| CCM1              | Normal                                                                                                                                                       | Normal                         |
| CCM2              | Many cells showed increased FAs. Focal adhesions were no longer restricted to the periphery of the cell.                                                     | Increase in stress fibers.     |
| CCM3              | Unstimulated knockdown cells were more spread than control cells, and showed many cellular protrusions. Cells still spread and formed FAs with 007.          | Increase in stress fibers.     |
| CDC42             | Normal                                                                                                                                                       | Normal                         |
| DGKQ              | Normal                                                                                                                                                       | Normal                         |
| DLG5              | Normal                                                                                                                                                       | Normal                         |
| EBP50             | Normal                                                                                                                                                       | Normal                         |

|              |                                                                                                                                      |                                                                                                                |
|--------------|--------------------------------------------------------------------------------------------------------------------------------------|----------------------------------------------------------------------------------------------------------------|
| E-cadherin   | Normal                                                                                                                               | Normal                                                                                                         |
| Epac1        | Cells did not spread or form FAs with 007.                                                                                           | Normal                                                                                                         |
| Epac2        | Normal                                                                                                                               | Normal                                                                                                         |
| Exoc2        | Normal                                                                                                                               | Normal                                                                                                         |
| Exoc8        | Unstimulated cells were already spread, with small FAs. 007 still induced spreading but FAs remained small.                          | Increase in actin protrusions/filopodia in basal conditions. 007 induced small stress fibers throughout cells. |
| Ezrin        | Cells displayed a defect in spreading and FA induction in response to 007.                                                           | Mixed                                                                                                          |
| FRMPD1       | Normal                                                                                                                               | Normal                                                                                                         |
| ICAP         | Normal                                                                                                                               | Normal                                                                                                         |
| IQGAP        | Normal                                                                                                                               | Normal                                                                                                         |
| Lamellipodin | Normal                                                                                                                               | Thin unorganized actin fibers throughout cells.                                                                |
| LIMK         | Normal                                                                                                                               | Normal                                                                                                         |
| Moesin       | Normal                                                                                                                               | Normal                                                                                                         |
| Occludin     | Normal                                                                                                                               | Normal                                                                                                         |
| p120-catenin | Normal                                                                                                                               | Normal                                                                                                         |
| Par3         | Normal                                                                                                                               | Normal                                                                                                         |
| Par6         | Normal                                                                                                                               | Normal                                                                                                         |
| PDZGEF1      | Mixed effect. Some unstimulated cells showed the 007-phenotype, although this was not reproducible. The response to 007 was normal.  | Some unstimulated cells showed the 007-phenotype, although this was not reproducible.                          |
| PDZGEF2      | Normal. Following 007, some cells showed an increase in FAs. Focal adhesions were no longer restricted to the periphery of the cell. | Increase in small stress fibers throughout cells.                                                              |
| PDZK10       | Normal                                                                                                                               | Normal                                                                                                         |
| Rac1         | Normal                                                                                                                               | Normal                                                                                                         |
| Radixin      | Normal                                                                                                                               | Normal                                                                                                         |
| RalA         | Normal                                                                                                                               | Normal                                                                                                         |
| RalB         | Normal                                                                                                                               | Normal                                                                                                         |
| RalGDS       | Normal                                                                                                                               | Normal                                                                                                         |
| Rap1A        | Cells displayed a defect in basal spreading. There was no spreading or FA induction upon 007.                                        | Normal                                                                                                         |
| Rap1B        | Normal                                                                                                                               | Normal                                                                                                         |

|          |                                                                                                                                      |                                                                |
|----------|--------------------------------------------------------------------------------------------------------------------------------------|----------------------------------------------------------------|
| Rap1GAP1 | Normal. Following 007, some cells showed an increase in FAs. Focal adhesions were no longer restricted to the periphery of the cell. | Increase in small stress fibers throughout cells.              |
| Rap1GAP2 | Normal                                                                                                                               | Normal                                                         |
| Rap2A    | Normal                                                                                                                               | Normal                                                         |
| Rap2B    | Normal                                                                                                                               | Normal                                                         |
| Rap2C    | Normal                                                                                                                               | Normal                                                         |
| RapL     | Normal                                                                                                                               | Increase in small stress fibers throughout cells.              |
| RasGRP1  | Normal. Following 007, some cells showed an increase in FAs. Focal adhesions were no longer restricted to the periphery of the cell. | Normal                                                         |
| RasGRP2  | Normal                                                                                                                               | Normal                                                         |
| RasGRP3  | Normal                                                                                                                               | Normal                                                         |
| Rgl1     | Normal. Following 007, some cells showed an increase in FAs. Focal adhesions were no longer restricted to the periphery of the cell. | Normal                                                         |
| RhoA     | Normal                                                                                                                               | Normal                                                         |
| Riam     | Normal                                                                                                                               | Increase in small stress fibers throughout cells.              |
| Rin1     | Normal. Following 007, some cells showed an increase in FAs. Focal adhesions were no longer restricted to the periphery of the cell. | Normal                                                         |
| RockI    | Normal                                                                                                                               | Normal                                                         |
| RockII   | Basal adhesion of cells was decreased. The spreading and FA induction defect in response to 007 was inhibited.                       | Mixed                                                          |
| R-Ras    | Normal                                                                                                                               | Normal                                                         |
| Sec15L1  | Normal                                                                                                                               | Normal                                                         |
| Sec15L2  | Normal                                                                                                                               | Normal                                                         |
| Sec8     | Normal                                                                                                                               | Normal                                                         |
| SHIP2    | Normal                                                                                                                               | Normal                                                         |
| Spa1     | Normal                                                                                                                               | Normal                                                         |
| Talin1   | Cells showed a defect in basal adhesion and spreading, which was not rescued by 007.                                                 | Normal actin phenotype, although the cells did not spread well |
| Talin2   | Normal                                                                                                                               | Normal                                                         |
| Tiam1    | Normal                                                                                                                               | Normal                                                         |
| Vasp     | Normal                                                                                                                               | Normal                                                         |
| Vav1     | Normal                                                                                                                               | Normal                                                         |

|      |                                                   |                                 |
|------|---------------------------------------------------|---------------------------------|
| Vav2 | Normal. Cells did not become very round with 007. | Normal                          |
| Vav3 | Normal                                            | Normal                          |
| ZAK  | Normal                                            | Increase in small actin fibers. |
