# Supplementary figures and images for: Ezrin is required for efficient Rap1-induced cell spreading
Source: Oxford University Press journal article supplement (doi:10.1242/jcs.079830), 2011-05-04

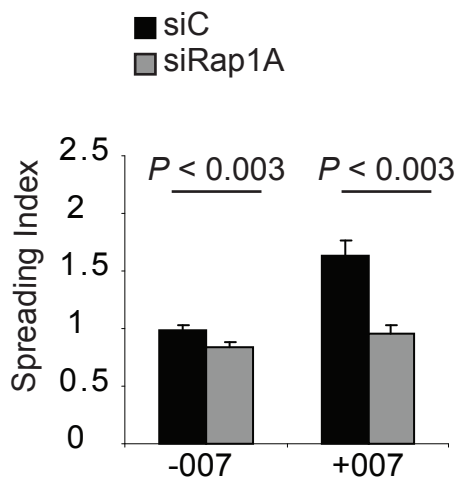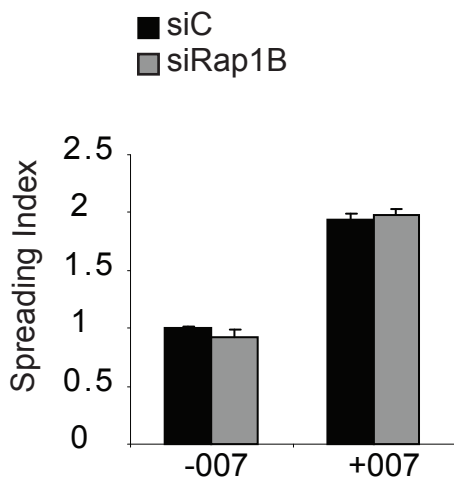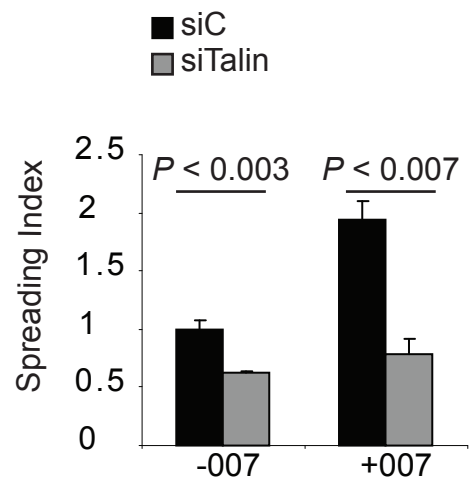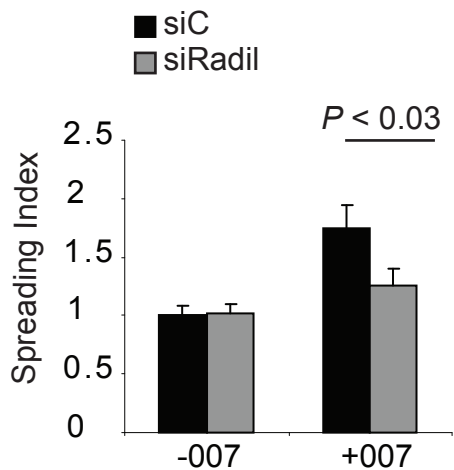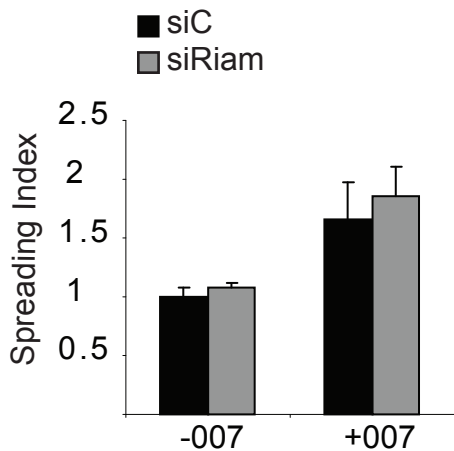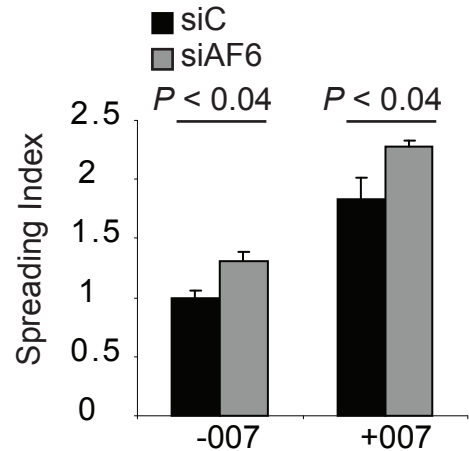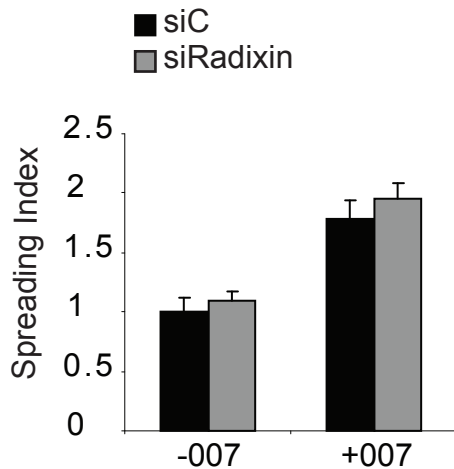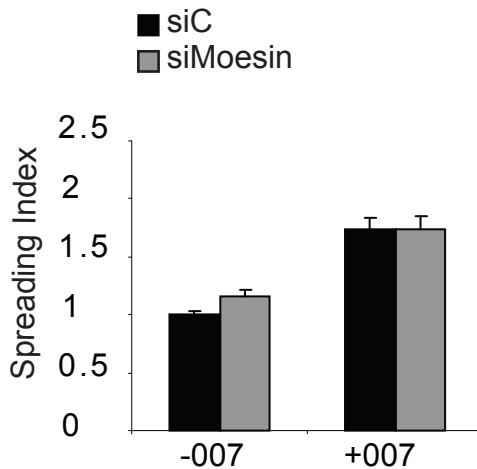

Supplement: jcs079830-sup-jcs79830figs2.pdf [file jcs079830-sup-jcs79830figs2.pdf]
